# Supplementary material
Source: HighWire-hosted journal article supplement (https://erj.ersjournals.com/highwire/filestream/112926/field_highwire_adjunct_files/0/ERJ_10_2189.pdf)
Supplement: ERJ_10_2189.pdf [file ERJ_10_2189.pdf]

## AUTHORS' CORRECTION

**"Pulmonary perspective: immunology in diagnosis and treatment of lung cancer." P. Weynants, F-X. Marchandise, Y. Sibille.  
*Eur Respir J* 1997; 10: 1703–1719.**

Table 3 was incorrectly printed. The correct version is printed below:

Table 3. – Percentage of non-small cell lung cancer (NSCLC) expressing antigens encoded by MAGE, BAGE or GAGE genes (n=104 patients)

| NSCLC<br>expressing | MAGE-BAGE-GAGE | HLA Haplotype |             |              |              |              |
|---------------------|----------------|---------------|-------------|--------------|--------------|--------------|
|                     |                | A1<br>% (26%) | A2<br>(49%) | B44<br>(22%) | CW16<br>(8%) | CW6<br>(16%) |
| MAGE-1              | 45             | 12*           |             |              | 4*           |              |
| MAGE-3              | 49             | 13*           | 24*         | 11*          |              |              |
| MAGE-6              | 52             |               |             |              | 4*           |              |
| BAGE                | 5              |               |             |              | 0*           |              |
| GAGE                | 19             |               |             |              |              | 3*           |

Values in parenthesis are the human leucocyte antigen (HLA) frequency for Caucasians. \*: values are the percentage of patients with a tumour expressing a tumour antigen (TA) encoded by MAGE, BAGE, and GAGE for each HLA haplotype. In total, 71% of NSCLC patients could be eligible for vaccination with one of these TAs. However, some NSCLC tumours express more than one TA. Therefore, in practice only 49% of NSCLC patients were eligible for vaccination.
